# Supplementary material for: Ion exchange for synthesis of porous CuxO/SnO2/ZnSnO3 microboxes as a high-performance lithium-ion battery anode
Source: Royal Society of Chemistry journal article supplement (doi:10.1039/c8nj02391c), 2018-01-01
Supplement: c8nj02391c1.pdf [file c8nj02391c1.pdf]

## Supporting Information

### Ion Exchange for Synthesis of Porous $\text{Cu}_x\text{O}/\text{SnO}_2/\text{ZnSnO}_3$ Microboxes as High-Performance Lithium-ion Battery Anode

Min Zhang<sup>1</sup>, Jingjing Ma<sup>1</sup>, Yidan Zhang<sup>2</sup>, Leidan Lu<sup>1</sup>, Yaqin Chai<sup>1</sup>, Ruo Yuan<sup>1</sup>, Xia Yang<sup>1\*</sup>

<sup>1</sup> Key Laboratory of Luminescent and Real-Time Analytical Chemistry, Ministry of Education; College of Chemistry and Chemical Engineering, Southwest University, Chongqing, PR China

<sup>2</sup> TH-UNIS Insight Co., Ltd., No.18 Anningzhuang East Road Haidian District, Beijing, 100085, PR China

The X-ray photoelectron spectroscopy (XPS) survey spectrum (Figure S1a) suggested that the presence of Zn, Sn and O elements in  $\text{ZnSn}(\text{OH})_6$  sample. There are two peaks at 1021.4 and 1044.8 eV in Zn 2p spectra (Figure S1b), which correspond to the binding energy (BE) values of Zn 2p 3/2, Zn 2p 1/2 for  $\text{Zn}^{2+}$  state.<sup>1</sup> In the Sn 3d region, two obvious peaks at 486.6 and 495.0 eV are assigned to Sn 3d 5/2 and Sn 3d 3/2 of  $\text{Sn}^{4+}$  ion (Figure S2c).<sup>2</sup>

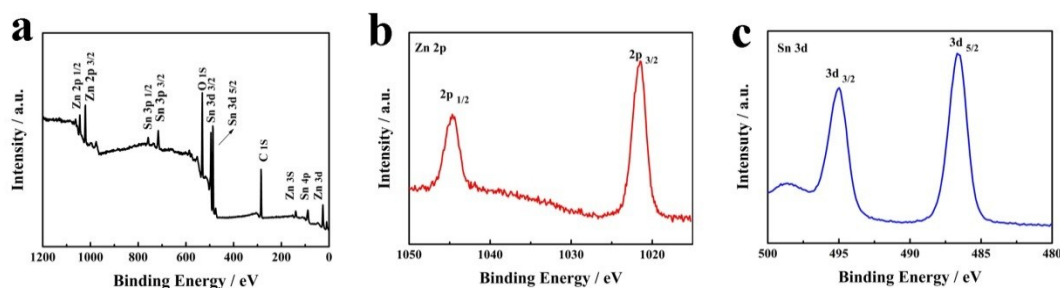

Figure S1(a) XPS survey scan spectra, (b) Zn (2p), (c) Sn (3d) regions for  $\text{ZnSn}(\text{OH})_6$

As shown in Figure S2a, the XPS survey spectrum of  $\text{CuSn}(\text{OH})_6/\text{ZnSn}(\text{OH})_6$  indicated the sample contained Zn, Sn, Cu and O elements. In the Zn 2p region (Figure S2b), two peaks

\*Corresponding author.

E-mail address: [xiayang2@swu.edu.cn](mailto:xiayang2@swu.edu.cn) (X. Yang)

at 1021.3 and 1044.6 eV were assigned to Zn 2p 3/2, Zn 2p 1/2 for Zn<sup>2+</sup> state. Figure S2c showed two peaks at 486.5 and 494.9 eV, which correspond BE values of Sn 3d 5/2 and Sn 3d 3/2 of Sn<sup>4+</sup> ion. The Cu 2p spectra showed two peaks at 933.4 and 953.5 eV (Figure S2d), which were attributed to the Cu 2p 3/2 and Cu 2p 1/2. In addition to, the shake-up satellite peaks were detected at 942.5 and 962.2 eV, corresponding to the characteristic of d<sup>9</sup> Cu (II) compounds.<sup>3</sup>

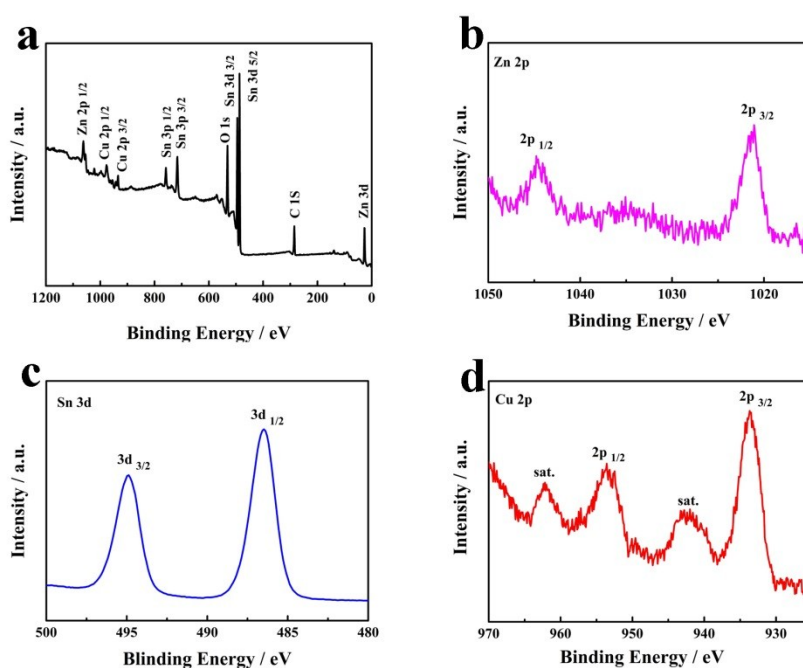

Figure S2 (a) XPS survey scan spectra, (b) Zn (2p), (c) Sn (3d), (d) Cu (2p) regions for CuSn(OH)<sub>6</sub>/ZnSn(OH)<sub>6</sub>.

## References

- [1] P. Dhage, A. Samokhvalov, D. Repala, E. C. Duin, M. Bowman and B. J. Tatarchuk, *Ind. Eng. Chem. Res.*, 2010, **49**, 8388.
- [2] L. Han, J. Liu, Z. Wang, K. Zhang, H. Luo, B. Xu, X. Zou, X. Zheng, B. Ye and X. Yu, *CrystEngComm.*, 2012, **14**, 3380.
- [3] B. J. C. Park, J. Kim, H. Kwon, and H. Song, *Adv. Mater.*, 2009, **21**, 803.
